# Supplementary material for: ZBTB33 Is Mutated in Clonal Hematopoiesis and Myelodysplastic Syndromes and Impacts RNA Splicing
Source: Oxford University Press journal article supplement (doi:10.1158/2643-3230.bcd-20-0224), 2021-07-14
Supplement: 26433230bcd200224-sup-257211_2_supp_7130389_qtdhf6.xlsx [file 26433230bcd200224-sup-257211_2_supp_7130389_qtdhf6.xlsx]

## Sheet: table_s1
Supplementary Table S1: Cohort information for discovery set.
Cohort	Total n	CHIP carriers	Mean age	Reference
JHS	3269	158	54.9156	Jaiswal 2014 NEJM
ARIC	397	17	54.466	Stitziel 2017 JACC
ATVB	3449	56	39.6164	Stitziel 2017 JACC
AW	1059	76	57.3749	Jaiswal 2014 NEJM
Bipolar	1172	46		Genovese 2014 NEJM
Botnia	383	16	62.2445	Jaiswal 2014 NEJM
Cleveland Clinic	40	7	52.425	Stitziel 2017 JACC
Diabetes_reg	100	5	51.2956	Jaiswal 2014 NEJM
EK	1075	44	58.6902	Jaiswal 2014 NEJM
ES	1068	45	58.2252	Jaiswal 2014 NEJM
FUSION	944	49	60.2948	Jaiswal 2014 NEJM
HA	253	6	48.2813	Jaiswal 2014 NEJM
HARPS	420	18	47.2945	Stitziel 2017 JACC
Helsinki-sib	63	4	61.9243	Jaiswal 2014 NEJM
HS	1455	40	48.0536	Jaiswal 2014 NEJM
KORA	188	6	65.3404	Jaiswal 2014 NEJM
Malmo-sib	47	4	59.7019	Jaiswal 2014 NEJM
MEC	941	63	68.0032	Jaiswal 2014 NEJM
MESA	89	8	60.4045	Jaiswal 2014 NEJM
MexB1	1093	30	55.1052	Jaiswal 2014 NEJM
MexB2	570	17	56.8281	Jaiswal 2014 NEJM
MexB3	831	38	62.9242	Jaiswal 2014 NEJM
MGH-PCAD	146	3	47.4336	Stitziel 2017 JACC
MPP	332	28	61.3337	Jaiswal 2014 NEJM
PennCATH	38	1	47.6486	Stitziel 2017 JACC
PROCARDIS	2034	144	63.0359	Stitziel 2017 JACC
PROMIS	8514	206	50.9837	Stitziel 2017 JACC
SCZ	11232	603	55.233	Genovese 2014 NEJM
SL	1069	44	58.1534	Jaiswal 2014 NEJM
SS	1148	56	58.4242	Jaiswal 2014 NEJM
STT	319	16	60.72	Jaiswal 2014 NEJM
TRIUMPH	103	2	47.5243	Stitziel 2017 JACC
UA	848	100	70.9774	Jaiswal 2014 NEJM
UM	987	40	57.5309	Jaiswal 2014 NEJM

## Sheet: table_s2
Supplementary Table S2: Number of putative somatic nonsense variants in top 40 genes from nonsense mutation screen.
Gene	Number of putative somatic nonsense variants
DNMT3A	114
ASXL1	66
TET2	62
PPM1D	29
ZNF318	22
SRCAP	16
BRCC3	11
YLPM1	11
NF1	10
PCLO	8
PHIP	8
ZBTB33	8
MED12	7
NAPEPLD	7
NXF1	7
LRP1	6
RAD21	6
RBPJ	6
ZNRF4	6
BAZ1A	5
CDYL	5
MMP15	5
PHC1	5
PTPRU	5
RASGRF1	5
ARHGEF7	4
BCORL1	4
CBL	4
CRYAA	4
GH1	4
GRIA2	4
HBZ	4
OPA1	4
PLXNB2	4
PNLIP	4
PRAMEF22	4
RAPGEF2	4
RBBP6	4
SLC39A6	4
ZBTB7A	4

## Sheet: table_s3
Supplementary Table S3: Full list of putative somatic variants in SRCAP, YLPM1, ZBTB33, and ZNF318.
Hugo_Symbol	Chromosome	Start_position	Variant_Classification	Reference_Allele	Tumor_Seq_Allele2	Protein_Change	alt_count	ref_count	VAF	cohort
SRCAP	16	30709858	Frame_Shift_Del	CTT	C	F289fs	8	34	0.190476	BioMe
SRCAP	16	30709959	Frame_Shift_Del	AGCTGCTTCGCC	A	E322fs	6	31	0.162162	WHI
SRCAP	16	30710847	Frame_Shift_Ins	G	GCGGAGGATGAAGAGGATACTATAGCAGCTGAGGAACA	A410fs	3	39	0.0714286	FHS
SRCAP	16	30711002	Frame_Shift_Del	AG	A	E411fs	4	28	0.125	CHS
SRCAP	16	30711606	Frame_Shift_Del	GCAGGAGCCTATGCCCCAGGCTCTGGGA	-	A452fs	6	92	0.0612245	AJ
SRCAP	16	30711660	Frame_Shift_Ins	G	GT	V470fs	14	26	0.35	FHS
SRCAP	16	30711738	Nonsense_Mutation	C	T	Q496*	14	81	0.147368	MexB3
SRCAP	16	30712003	Frame_Shift_Ins	T	TG	L554fs	4	40	0.0909091	FHS
SRCAP	16	30712441	Splice_Site	T	A	.	12	80	0.130435	SCZ
SRCAP	16	30712782	Nonsense_Mutation	T	G	Y699*	3	28	0.0967742	COPDGene
SRCAP	16	30713289	Nonsense_Mutation	A	T	K738*	6	138	0.0416667	Diabetes_reg
SRCAP	16	30713297	Nonsense_Mutation	G	A	W740*	4	73	0.0519481	AJ
SRCAP	16	30713631	Nonsense_Mutation	G	T	E805X	6	50	0.107143	BioMe
SRCAP	16	30713644	Frame_Shift_Del	ATCCCC	A	N809fs	5	43	0.104167	BioMe
SRCAP	16	30713712	Splice_Site	G	A	.	10	35	0.222222	PROMIS
SRCAP	16	30716195	Nonsense_Mutation	C	T	Q875*	3	33	0.0833333	FHS
SRCAP	16	30716203	Splice_Site	G	A	.	16	145	0.0993789	SCZ
SRCAP	16	30716390	Nonsense_Mutation	C	T	R910*	15	434	0.0334076	SCZ
SRCAP	16	30716409	Frame_Shift_Del	TC	T	F916fs	4	27	0.129032	WHI
SRCAP	16	30716479	Frame_Shift_Ins	G	GCGGATAGACATGGGTCGATTTGACCTTATTGGCCTGGAAGGTCGTGTCTCTCGATATGAGGCAGACACATTTCTGCCCCGGCACC	Q939fs	3	31	0.0882353	FHS
SRCAP	16	30721203	Frame_Shift_Ins	C	CT	L1090fs	9	32	0.219512	COPDGene
SRCAP	16	30721265	Frame_Shift_Ins	-	C	P1111fs	36	507	0.0662983	Cleveland Clinic
SRCAP	16	30721322	Frame_Shift_Del	GC	G	P1130fs	3	34	0.0810811	COPDGene
SRCAP	16	30723608	Nonsense_Mutation	T	A	L1395*	9	162	0.0526316	SCZ
SRCAP	16	30723719	Nonsense_Mutation	C	G	S1432*	10	258	0.0373134	UM
SRCAP	16	30723765	Frame_Shift_Del	TC	T	P1448fs	3	27	0.1	CHS
SRCAP	16	30724052	Frame_Shift_Del	CA	C	P1543fs	4	36	0.1	BioMe
SRCAP	16	30724306	Frame_Shift_Del	C	-	P1628fs	8	120	0.0625	SCZ
SRCAP	16	30724335	Frame_Shift_Del	TC	T	P1638fs	3	36	0.0769231	CHS
SRCAP	16	30724382	Frame_Shift_Del	CT	-	P1653fs	34	164	0.171717	SCZ
SRCAP	16	30724459	Nonsense_Mutation	C	T	Q1679*	4	37	0.097561	CHS
SRCAP	16	30724535	Frame_Shift_Del	CG	C	T1704fs	4	27	0.129032	WHI
SRCAP	16	30724677	Frame_Shift_Del	AC	ACC,A	P1752fs	3	28	0.0967742	WHI
SRCAP	16	30724745	Nonsense_Mutation	C	A	S1774*	6	33	0.153846	PROCARDIS
SRCAP	16	30724879	Nonsense_Mutation	C	T	Q1819*	5	91	0.0520833	SCZ
SRCAP	16	30725041	Nonsense_Mutation	C	T	R1873*	30	170	0.15	EK
SRCAP	16	30725041	Nonsense_Mutation	C	T	R1873*	69	107	0.392045	UM
SRCAP	16	30728997	Frame_Shift_Del	GGTCTGAACGCCT	-	RSERL1897fs	10	120	0.0769231	HARPS
SRCAP	16	30729029	Frame_Shift_Del	AGTG	-	S1908fs	7	104	0.0630631	FUSION
SRCAP	16	30729081	Frame_Shift_Ins	T	TC	F1925fs	6	30	0.166667	WHI
SRCAP	16	30729176	Frame_Shift_Ins	C	CG	R1957fs	4	32	0.111111	WHI
SRCAP	16	30729200	Nonsense_Mutation	C	T	R1965X	6	57	0.0952381	BioMe
SRCAP	16	30729209	Nonsense_Mutation	C	T	Q1968*	6	27	0.181818	WHI
SRCAP	16	30733312	Nonsense_Mutation	C	T	Q2054*	6	129	0.0444444	PROCARDIS
SRCAP	16	30733333	Nonsense_Mutation	C	T,A	R2061*	7	30	0.189189	WHI
SRCAP	16	30733360	Nonsense_Mutation	C	T	R2070*	13	152	0.0787879	MEC
SRCAP	16	30733730	Frame_Shift_Del	CA	C	T2143fs	4	37	0.097561	CHS
SRCAP	16	30733764	Nonsense_Mutation	C	T	R2154*	5	44	0.102041	COPDGene
SRCAP	16	30733790	Frame_Shift_Del	CAT	C	I2163fs	3	35	0.0789474	WHI
SRCAP	16	30733800	Splice_Site	T	A	.	4	45	0.0816327	AJ
SRCAP	16	30737151	Frame_Shift_Del	TC	T	S2371fs	7	31	0.184211	FHS
SRCAP	16	30737370	Nonsense_Mutation	C	T	R2444*	3	21	0.125	AJ
SRCAP	16	30738876	Nonsense_Mutation	C	T	R2946X	4	29	0.121212	BioMe
YLPM1	14	74764014	Nonsense_Mutation	C	A	Y175*	3	20	0.130435	PROMIS
YLPM1	14	74764243	Frame_Shift_Ins	-	C	A252fs	18	68	0.209302	SCZ
YLPM1	14	74764315	Nonsense_Mutation	C	A,T,G	Q276*	7	22	0.241379	CHS
YLPM1	14	74780438	Nonsense_Mutation	C	T	Q382*	16	21	0.432432	WHI
YLPM1	14	74780450	Frame_Shift_Del	GCAGCAGCACACTG	-	AAAHW386fs	27	160	0.144385	PROCARDIS
YLPM1	14	74780450	Frame_Shift_Del	GCAGCAGCACACTG	-	AAAHW386fs	8	98	0.0754717	AJ
YLPM1	14	74780483	Nonsense_Mutation	C	T	R397*	19	143	0.117284	SCZ
YLPM1	14	74780582	Nonsense_Mutation	C	T	Q430*	18	17	0.514286	COPDGene
YLPM1	14	74780582	Nonsense_Mutation	C	T	Q430*	12	27	0.307692	COPDGene
YLPM1	14	74781338	Frame_Shift_Del	TG	T	M432fs	3	37	0.075	BioMe
YLPM1	14	74781407	Nonsense_Mutation	G	A	W455*	3	31	0.0882353	WHI
YLPM1	14	74781412	Nonsense_Mutation	C	T	R457*	4	30	0.117647	BioMe
YLPM1	14	74781798	Frame_Shift_Ins	-	G	G586fs	13	187	0.065	SCZ
YLPM1	14	74781976	Nonsense_Mutation	C	T	Q645*	11	33	0.25	BioMe
YLPM1	14	74781988	Frame_Shift_Del	GCCCCAGTTCCACCAGC	G	A649fs	9	25	0.264706	COPDGene
YLPM1	14	74782297	Frame_Shift_Del	AG	A	S752fs	9	24	0.272727	WHI
YLPM1	14	74782305	Frame_Shift_Del	G	-	L754fs	8	90	0.0816327	SCZ
YLPM1	14	74797688	Nonsense_Mutation	T	G	Y797*	3	12	0.2	COPDGene
YLPM1	14	74797737	Frame_Shift_Ins	C	CG	R814fs	8	17	0.32	COPDGene
YLPM1	14	74797788	Nonsense_Mutation	C	T	R831*	35	48	0.421687	SCZ
YLPM1	14	74797845	Nonsense_Mutation	C	T	Q850*	19	55	0.256757	MexB2
YLPM1	14	74797879	Frame_Shift_Ins	G	GA	G861fs	4	35	0.102564	BioMe
YLPM1	14	74797914	Nonsense_Mutation	C	T	Q873*	30	63	0.322581	SCZ
YLPM1	14	74798055	Nonsense_Mutation	G	T	E920X	3	32	0.0857143	BioMe
YLPM1	14	74798160	Nonsense_Mutation	C	T	Q955*	5	37	0.119048	BioMe
YLPM1	14	74798167	Frame_Shift_Del	CT	C	T957fs	7	25	0.21875	COPDGene
YLPM1	14	74798183	Frame_Shift_Del	AG	-	G964fs	10	103	0.0884956	PROCARDIS
YLPM1	14	74798411	Frame_Shift_Del	CAG	C	R1039fs	6	26	0.1875	COPDGene
YLPM1	14	74798441	Frame_Shift_Del	C	-	G1048fs	11	148	0.0691824	MEC
YLPM1	14	74798673	Nonsense_Mutation	C	T	R1126*	37	23	0.616667	PROCARDIS
YLPM1	14	74798673	Nonsense_Mutation	C	T	R1126*	39	34	0.534247	PROCARDIS
YLPM1	14	74798673	Nonsense_Mutation	C	T	R1126*	23	19	0.547619	MPP
YLPM1	14	74798706	Nonsense_Mutation	C	A,T	R1137*	10	33	0.232558	WHI
YLPM1	14	74798790	Frame_Shift_Del	GA	G	D1165fs	9	23	0.28125	COPDGene
YLPM1	14	74798876	Nonsense_Mutation	G	A	W1193*	6	26	0.1875	WHI
YLPM1	14	74798937	Nonsense_Mutation	G	T,C	E1214*	10	34	0.227273	CHS
YLPM1	14	74798940	Nonsense_Mutation	C	T	R1215*	3	33	0.0833333	AW
YLPM1	14	74798977	Frame_Shift_Del	GGA	G	W1227fs	6	39	0.133333	FHS
YLPM1	14	74799078	Nonsense_Mutation	C	T	R1261*	7	31	0.184211	FHS
YLPM1	14	74799078	Nonsense_Mutation	C	T	R1261*	9	27	0.25	WHI
YLPM1	14	74799335	Nonsense_Mutation	T	C,A	Y1346*	5	31	0.138889	BioMe
YLPM1	14	74799349	Nonsense_Mutation	G	A	W1351*	10	184	0.0515464	PROCARDIS
YLPM1	14	74799409	Frame_Shift_Ins	T	TGA	L1371fs	11	26	0.297297	BioMe
YLPM1	14	74799417	Nonsense_Mutation	C	T	R1374*	12	55	0.179104	PROMIS
YLPM1	14	74799420	Nonsense_Mutation	G	T	E1375*	3	25	0.107143	COPDGene
YLPM1	14	74799456	Nonsense_Mutation	C	T	R1387*	8	186	0.0412371	SCZ
YLPM1	14	74799456	Nonsense_Mutation	C	T	R1387*	121	131	0.480159	ES
YLPM1	14	74802637	Frame_Shift_Ins	A	AAGATTGC	S1494fs	5	42	0.106383	WHI
YLPM1	14	74809575	Nonsense_Mutation	C	T	R1573*	3	27	0.1	FHS
YLPM1	14	74809623	Nonsense_Mutation	C	T	Q1589*	3	34	0.0810811	UM
YLPM1	14	74809758	Frame_Shift_Del	CCA	C	P1634fs	12	24	0.333333	COPDGene
YLPM1	14	74809794	Nonsense_Mutation	C	T	R1646*	28	31	0.474576	FHS
YLPM1	14	74809798	Splice_Site	G	A	.	5	51	0.0892857	AW
YLPM1	14	74809987	Nonsense_Mutation	TC	T	S1673*	6	27	0.181818	FHS
YLPM1	14	74810260	Frame_Shift_Del	AG	-	R1690fs	29	94	0.235772	SCZ
YLPM1	14	74810311	Nonsense_Mutation	C	T	R1707*	5	29	0.147059	WHI
YLPM1	14	74810386	Nonsense_Mutation	C	T	R1732*	5	121	0.0396825	ATVB
YLPM1	14	74810386	Nonsense_Mutation	C	T	R1732*	70	72	0.492958	SCZ
YLPM1	14	74810404	Nonsense_Mutation	C	T	R1738*	4	24	0.142857	AJ
YLPM1	14	74810410	Nonsense_Mutation	C	T	R1740*	13	48	0.213115	PROMIS
YLPM1	14	74811705	Nonsense_Mutation	C	T	R1772*	3	22	0.12	COPDGene
YLPM1	14	74812685	Frame_Shift_Ins	A	ACC	H1802fs	10	25	0.285714	COPDGene
YLPM1	14	74812705	Nonsense_Mutation	C	T	R1809*	4	29	0.121212	WHI
ZBTB33	X	120253440	Missense_Mutation	G	C	A9P	10	166	0.0568182	FUSION
ZBTB33	X	120253447	Missense_Mutation	A	T	D11V	12	209	0.0542986	PROCARDIS
ZBTB33	X	120253447	Missense_Mutation	A	G	D11G	13	74	0.149425	SCZ
ZBTB33	X	120253459	Missense_Mutation	C	G	S15C	6	105	0.0540541	SCZ
ZBTB33	X	120253471	Missense_Mutation	T	C	L19P	7	45	0.134615	CHS
ZBTB33	X	120253471	Missense_Mutation	T	C	L19P	5	32	0.135135	WHI
ZBTB33	X	120253471	Missense_Mutation	T	C	L19P	15	85	0.15	MEC
ZBTB33	X	120253488	Missense_Mutation	C	G	Q25E	10	194	0.0490196	ES
ZBTB33	X	120253489	Missense_Mutation	A	G	Q25R	4	26	0.133333	WHI
ZBTB33	X	120253491	Missense_Mutation	C	T	R26C	4	91	0.0421053	PROMIS
ZBTB33	X	120253491	Missense_Mutation	C	T	R26C	4	36	0.1	PROMIS
ZBTB33	X	120253491	Missense_Mutation	C	T	R26C	10	165	0.0571429	SCZ
ZBTB33	X	120253492	Missense_Mutation	G	A	R26H	21	94	0.182609	MexB3
ZBTB33	X	120253509	Missense_Mutation	T	G	C32G	3	20	0.130435	CHS
ZBTB33	X	120253510	Missense_Mutation	G	A	C32Y	8	22	0.266667	WHI
ZBTB33	X	120253510	Missense_Mutation	G	A	C32Y	9	134	0.0629371	SL
ZBTB33	X	120253516	Missense_Mutation	T	G	V34G	16	254	0.0592593	SCZ
ZBTB33	X	120253516	Missense_Mutation	T	A	V34D	16	82	0.163265	UA
ZBTB33	X	120253518	Missense_Mutation	A	C	T35P	9	30	0.230769	WHI
ZBTB33	X	120253537	Missense_Mutation	G	A	R41Q	12	407	0.0286396	STT
ZBTB33	X	120253537	Missense_Mutation	G	A	R41Q	11	267	0.0395683	MexB2
ZBTB33	X	120253548	Missense_Mutation	G	C	A45P	4	68	0.0555556	SCZ
ZBTB33	X	120253563	Missense_Mutation	C	A	L50I	23	146	0.136095	PROCARDIS
ZBTB33	X	120253563	Missense_Mutation	C	A	L50I	9	16	0.36	FHS
ZBTB33	X	120253575	Missense_Mutation	A	G	S54G	12	21	0.363636	CHS
ZBTB33	X	120253582	Missense_Mutation	A	G	Y56C	3	38	0.0731707	WHI
ZBTB33	X	120253582	Missense_Mutation	A	G	Y56C	11	195	0.0533981	SS
ZBTB33	X	120253582	Missense_Mutation	A	G	Y56C	5	20	0.2	BioMe
ZBTB33	X	120253591	Missense_Mutation	A	C	Q59P	4	25	0.137931	CHS
ZBTB33	X	120253611	Frame_Shift_Del	CA	C	Q66fs	20	27	0.425532	WHI
ZBTB33	X	120253614	Missense_Mutation	G	A	V67I	23	16	0.589744	WHI
ZBTB33	X	120253614	Missense_Mutation	G	A	V67I	9	248	0.0350195	MexB3
ZBTB33	X	120253618	Missense_Mutation	T	A	V68D	4	87	0.043956	MEC
ZBTB33	X	120253624	Missense_Mutation	T	G	L70R	18	199	0.0829493	SCZ
ZBTB33	X	120253644	Missense_Mutation	A	T,G	I77F	4	14	0.222222	FHS
ZBTB33	X	120253645	Missense_Mutation	T	A	I77N	8	27	0.228571	SL
ZBTB33	X	120253667	Nonsense_Mutation	T	A	Y84*	7	31	0.184211	CHS
ZBTB33	X	120253672	Missense_Mutation	A	G	Y86C	3	36	0.0769231	WHI
ZBTB33	X	120253684	Missense_Mutation	T	A	I90N	13	33	0.282609	CHS
ZBTB33	X	120253714	Missense_Mutation	A	G	E100G	20	59	0.253165	SCZ
ZBTB33	X	120253735	Nonsense_Mutation	T	A	L107*	3	36	0.0769231	PROMIS
ZBTB33	X	120253737	Missense_Mutation	T	G	L108V	9	78	0.103448	PROCARDIS
ZBTB33	X	120253753	Missense_Mutation	T	A	I113K	3	16	0.157895	CHS
ZBTB33	X	120253753	Missense_Mutation	T	C	I113T	8	53	0.131148	SCZ
ZBTB33	X	120253762	Missense_Mutation	T	A	L116H	4	48	0.0769231	PROCARDIS
ZBTB33	X	120253762	Missense_Mutation	T	A	L116H	4	18	0.181818	COPDGene
ZBTB33	X	120253779	Nonsense_Mutation	C	T	Q122*	23	19	0.547619	CHS
ZBTB33	X	120253781	Frame_Shift_Del	G	-	Q122fs	8	32	0.2	MPP
ZBTB33	X	120253863	Nonsense_Mutation	C	T	Q150*	3	38	0.0731707	COPDGene
ZBTB33	X	120253918	Frame_Shift_Del	CAG	C	T168fs	14	30	0.318182	WHI
ZBTB33	X	120253970	Frame_Shift_Ins	T	TA	V185fs	4	34	0.105263	WHI
ZBTB33	X	120254029	Frame_Shift_Del	AG	A	K205fs	7	13	0.35	CHS
ZBTB33	X	120254067	Nonsense_Mutation	C	T	Q218*	9	90	0.0909091	Botnia
ZBTB33	X	120254154	Nonsense_Mutation	C	T	Q247*	9	2	0.818182	FHS
ZBTB33	X	120254154	Nonsense_Mutation	C	T	Q247*	20	77	0.206186	EK
ZBTB33	X	120254162	Frame_Shift_Ins	-	C	L249fs	18	98	0.155172	MPP
ZBTB33	X	120254174	Frame_Shift_Del	G	-	V253fs	10	71	0.123457	MexB1
ZBTB33	X	120254178	Nonsense_Mutation	C	T	Q255*	5	18	0.217391	PROMIS
ZBTB33	X	120254227	Nonsense_Mutation	C	A	S271*	17	31	0.354167	MexB3
ZBTB33	X	120254266	Frame_Shift_Ins	A	AT	N284fs	5	10	0.333333	BioMe
ZBTB33	X	120254268	Nonsense_Mutation	C	T	Q285*	3	45	0.0625	PROMIS
ZBTB33	X	120254343	Frame_Shift_Del	GT	G	V310fs	3	30	0.0909091	WHI
ZBTB33	X	120254387	Frame_Shift_Del	CA	C	K325fs	4	19	0.173913	WHI
ZBTB33	X	120254416	Frame_Shift_Del	TAATA	T	I334fs	3	19	0.136364	CHS
ZBTB33	X	120254435	Frame_Shift_Del	C	-	D340fs	30	107	0.218978	SCZ
ZBTB33	X	120254482	Frame_Shift_Del	TCCCACAGGCTGATACC	-	VPQADT356fs	6	101	0.0560748	SCZ
ZBTB33	X	120254495	Frame_Shift_Ins	T	TA	D360fs	3	14	0.176471	CHS
ZBTB33	X	120254497	Frame_Shift_Del	C	-	T361fs	24	82	0.226415	MexB1
ZBTB33	X	120254509	Frame_Shift_Del	CCAGTTTTGATGGAT	C	T365fs	5	31	0.138889	CHS
ZBTB33	X	120254524	Nonsense_Mutation	C	G	S370*	4	76	0.05	SCZ
ZBTB33	X	120254525	Frame_Shift_Ins	A	AT	S370fs	3	26	0.103448	COPDGene
ZBTB33	X	120254532	Nonsense_Mutation	C	T	Q373X	4	29	0.121212	CHS
ZBTB33	X	120254618	Frame_Shift_Del	TC	T	P402fs	3	21	0.125	BioMe
ZBTB33	X	120254632	Nonsense_Mutation	C	G	S406*	14	131	0.0965517	AJ
ZBTB33	X	120254632	Nonsense_Mutation	C	G	S406*	4	33	0.108108	WHI
ZBTB33	X	120254672	Frame_Shift_Ins	T	TA	D419fs	10	26	0.277778	FHS
ZBTB33	X	120254690	Frame_Shift_Del	AG	A	G426fs	8	22	0.266667	COPDGene
ZBTB33	X	120254708	Frame_Shift_Del	CA	C	K432fs	3	34	0.0810811	WHI
ZBTB33	X	120254715	Missense_Mutation	T	C	Y434H	3	24	0.111111	WHI
ZBTB33	X	120254719	Missense_Mutation	C	T	A435V	5	55	0.0833333	SCZ
ZBTB33	X	120254725	Missense_Mutation	T	C	I437T	4	44	0.0833333	SCZ
ZBTB33	X	120254727	Missense_Mutation	G	A	G438S	9	59	0.132353	UM
ZBTB33	X	120254728	Missense_Mutation	G	T	G438V	12	45	0.210526	Bipolar
ZBTB33	X	120254736	Missense_Mutation	A	G	T441A	15	104	0.12605	PROCARDIS
ZBTB33	X	120254739	Nonsense_Mutation	T	TA	Y442_D443delins*	3	19	0.136364	CHS
ZBTB33	X	120254739	Frame_Shift_Ins	-	A	Y442fs	8	52	0.133333	UM
ZBTB33	X	120254740	Missense_Mutation	A	G	Y442C	3	46	0.0612245	SL
ZBTB33	X	120254743	Missense_Mutation	A	G	D443G	3	26	0.103448	PROMIS
ZBTB33	X	120254752	Missense_Mutation	T	G	I446S	4	44	0.0833333	UA
ZBTB33	X	120254754	Missense_Mutation	C	G	P447A	5	22	0.185185	WHI
ZBTB33	X	120254794	Frame_Shift_Del	AGAAT	A	E460fs	7	42	0.142857	WHI
ZBTB33	X	120254844	Nonsense_Mutation	A	G	K477X	17	1	0.944444	BioMe
ZBTB33	X	120254866	Nonsense_Mutation	AT	A	Y484*	3	23	0.115385	CHS
ZBTB33	X	120254866	Frame_Shift_Ins	AT	ATT	Y484fs	16	1	0.941176	BioMe
ZBTB33	X	120254896	Missense_Mutation	A	G	Y494C	7	82	0.0786517	MEC
ZBTB33	X	120254901	Missense_Mutation	T	C	C496R	6	80	0.0697674	SCZ
ZBTB33	X	120254902	Missense_Mutation	G	T	C496F	39	57	0.40625	SCZ
ZBTB33	X	120254917	Missense_Mutation	G	T,C	R501T	6	19	0.24	WHI
ZBTB33	X	120254917	Missense_Mutation	G	C	R501T	18	124	0.126761	MPP
ZBTB33	X	120254923	Missense_Mutation	A	G,C	Y503S	3	36	0.0769231	WHI
ZBTB33	X	120254940	Missense_Mutation	T	G	L509V	7	114	0.0578512	SCZ
ZBTB33	X	120254949	Missense_Mutation	C	T,G	H512Y	4	36	0.1	BioMe
ZBTB33	X	120254950	Missense_Mutation	A	G	H512R	3	32	0.0857143	COPDGene
ZBTB33	X	120254956	Frame_Shift_Del	ACATT	A	N514fs	11	5	0.6875	CHS
ZBTB33	X	120254957	Missense_Mutation	C	G	N514K	4	51	0.0727273	SCZ
ZBTB33	X	120254968	Nonsense_Mutation	G	A,T	W518*	3	22	0.12	WHI
ZBTB33	X	120254969	Nonsense_Mutation	G	A	W518*	6	92	0.0612245	SCZ
ZBTB33	X	120254970	In_Frame_Del	GAGA	G	519_520del	3	12	0.2	COPDGene
ZBTB33	X	120254980	Missense_Mutation	A	G	Y522C	10	214	0.0446429	SCZ
ZBTB33	X	120254988	Missense_Mutation	C	T	R525C	34	117	0.225166	SCZ
ZBTB33	X	120254988	Missense_Mutation	C	T	R525C	26	193	0.118721	FUSION
ZBTB33	X	120254991	Missense_Mutation	T	A	Y526N	6	12	0.333333	FHS
ZBTB33	X	120254991	Frame_Shift_Ins	-	A	Y526fs	9	96	0.0857143	SCZ
ZBTB33	X	120254994	Missense_Mutation	T	C	C527R	6	155	0.0372671	MEC
ZBTB33	X	120254995	Missense_Mutation	G	A	C527Y	40	37	0.519481	UM
ZBTB33	X	120255009	Missense_Mutation	C	T	P532S	8	108	0.0689655	MEC
ZBTB33	X	120255016	Missense_Mutation	C	T	A534V	6	170	0.0340909	AW
ZBTB33	X	120255018	Missense_Mutation	G	C	E535Q	5	26	0.16129	FHS
ZBTB33	X	120255018	Missense_Mutation	G	A	E535K	4	74	0.0512821	AJ
ZBTB33	X	120255018	Missense_Mutation	G	C	E535Q	4	16	0.2	BioMe
ZBTB33	X	120255023	Nonsense_Mutation	T	G	Y536*	4	75	0.0506329	PROMIS
ZBTB33	X	120255024	Missense_Mutation	C	T	R537C	4	60	0.0625	ATVB
ZBTB33	X	120255024	Missense_Mutation	C	T	R537C	3	29	0.09375	COPDGene
ZBTB33	X	120255024	Missense_Mutation	C	T	R537C	63	28	0.692308	MEC
ZBTB33	X	120255025	Missense_Mutation	G	A	R537H	3	16	0.157895	COPDGene
ZBTB33	X	120255025	Missense_Mutation	G	A	R537H	4	42	0.0869565	WHI
ZBTB33	X	120255025	Missense_Mutation	G	A	R537H	8	30	0.210526	BioMe
ZBTB33	X	120255025	Missense_Mutation	G	A	R537H	33	7	0.825	SCZ
ZBTB33	X	120255027	Missense_Mutation	A	G	T538A	4	83	0.045977	SCZ
ZBTB33	X	120255028	Missense_Mutation	C	G	T538R	5	88	0.0537634	MEC
ZBTB33	X	120255033	Missense_Mutation	C	A	H540N	22	232	0.0866142	EK
ZBTB33	X	120255046	Missense_Mutation	A	G	H544R	4	28	0.125	WHI
ZBTB33	X	120255054	Missense_Mutation	G	A	E547K	7	5	0.583333	COPDGene
ZBTB33	X	120255061	Missense_Mutation	G	A	R549K	8	99	0.0747664	HS
ZBTB33	X	120255061	Missense_Mutation	G	A	R549K	82	84	0.493976	EK
ZBTB33	X	120255067	Missense_Mutation	A	C	Q551P	36	89	0.288	PROCARDIS
ZBTB33	X	120255069	Missense_Mutation	T	G	C552G	13	83	0.135417	SCZ
ZBTB33	X	120255070	Missense_Mutation	G	A	C552Y	6	96	0.0588235	SCZ
ZBTB33	X	120255079	Missense_Mutation	G	A	C555Y	4	83	0.045977	PROCARDIS
ZBTB33	X	120255079	Missense_Mutation	G	A	C555Y	8	34	0.190476	WHI
ZBTB33	X	120255100	Missense_Mutation	A	G	Y562C	50	49	0.505051	PROCARDIS
ZBTB33	X	120255100	Missense_Mutation	A	G	Y562C	18	172	0.0947368	AJ
ZBTB33	X	120255100	Missense_Mutation	A	G	Y562C	4	37	0.097561	COPDGene
ZBTB33	X	120255100	Missense_Mutation	A	G	Y562C	17	0	1	COPDGene
ZBTB33	X	120255100	Missense_Mutation	A	G	Y562C	4	19	0.173913	BioMe
ZBTB33	X	120255100	Missense_Mutation	A	G	Y562C	3	21	0.125	BioMe
ZBTB33	X	120255103	Missense_Mutation	A	C	Q563P	3	21	0.125	CHS
ZBTB33	X	120255111	Missense_Mutation	T	C	S566P	6	130	0.0441176	PROCARDIS
ZBTB33	X	120255133	Frame_Shift_Del	A	-	H573fs	19	90	0.174312	UA
ZBTB33	X	120255157	Frame_Shift_Ins	-	A	S581fs	44	22	0.666667	SS
ZBTB33	X	120255166	Missense_Mutation	A	G	Y584C	5	49	0.0925926	COPDGene
ZBTB33	X	120255186	Missense_Mutation	T	G	S591A	4	52	0.0714286	UA
ZBTB33	X	120255212	Nonsense_Mutation	T	G	Y599*	3	22	0.12	BioMe
ZBTB33	X	120255226	Frame_Shift_Del	C	-	S604fs	19	205	0.0848214	KORA
ZBTB33	X	120255286	Frame_Shift_Del	A	-	E624fs	9	48	0.157895	MPP
ZNF318	6	43339332	Nonsense_Mutation	G	A	R1556X	9	26	0.257143	BioMe
ZNF318	6	43339406	Frame_Shift_Ins	-	G	L1531fs	8	85	0.0860215	HARPS
ZNF318	6	43339419	Nonsense_Mutation	G	A	R1527*	9	37	0.195652	SCZ
ZNF318	6	43339419	Nonsense_Mutation	G	C	R1527X	10	14	0.416667	BioMe
ZNF318	6	43339607	Frame_Shift_Del	G	-	P1464fs	6	39	0.133333	SL
ZNF318	6	43339863	Frame_Shift_Del	TAGAC	T	L1377fs	3	33	0.0833333	CHS
ZNF318	6	43339872	Frame_Shift_Del	AG	A	T1375fs	3	44	0.0638298	FHS
ZNF318	6	43339879	Frame_Shift_Del	A	-	L1373fs	10	89	0.10101	KORA
ZNF318	6	43339919	Frame_Shift_Del	CG	C	R1360fs	10	39	0.204082	WHI
ZNF318	6	43339953	Nonsense_Mutation	G	A	R1349*	5	105	0.0454545	HS
ZNF318	6	43339953	Nonsense_Mutation	G	A	R1349*	34	54	0.386364	HS
ZNF318	6	43340097	Frame_Shift_Del	GA	G	I1300fs	3	24	0.111111	WHI
ZNF318	6	43340163	Nonsense_Mutation	T	A	K1279*	6	133	0.0431655	SCZ
ZNF318	6	43340217	Nonsense_Mutation	C	A	E1261*	27	103	0.207692	PROCARDIS
ZNF318	6	43340325	Nonsense_Mutation	C	A	E1225*	3	25	0.107143	WHI
ZNF318	6	43340363	Frame_Shift_Del	T	-	K1213fs	12	205	0.0552995	SCZ
ZNF318	6	43340392	Frame_Shift_Del	GC	G	R1202fs	9	20	0.310345	BioMe
ZNF318	6	43340415	Nonsense_Mutation	G	A	R1195*	7	134	0.0496454	AJ
ZNF318	6	43340435	Frame_Shift_Del	A	-	V1188fs	7	73	0.0875	STT
ZNF318	6	43340477	Frame_Shift_Ins	-	A	Y1174fs	12	44	0.214286	PROCARDIS
ZNF318	6	43340497	Nonsense_Mutation	A	T	Y1167X	4	34	0.105263	BioMe
ZNF318	6	43340788	Splice_Site_Mutation	A	G	.	4	28	0.125	COPDGene
ZNF318	6	43340789	Splice_Site	C	T	.	4	90	0.0425532	MexB3
ZNF318	6	43340792	Nonsense_Mutation	T	A	K1165*	64	146	0.304762	FUSION
ZNF318	6	43340795	Frame_Shift_Del	AT	A	K1163fs	6	24	0.2	COPDGene
ZNF318	6	43340828	Nonsense_Mutation	G	A	Q1153*	4	30	0.117647	WHI
ZNF318	6	43340870	Nonsense_Mutation	G	A	Q1139*	5	30	0.142857	WHI
ZNF318	6	43340898	Frame_Shift_Del	A	-	F1129fs	10	47	0.175439	UA
ZNF318	6	43340903	Nonsense_Mutation	C	CA	E1128_F1129delinsX	3	34	0.0810811	BioMe
ZNF318	6	43342110	Splice_Site	A	G	.	7	78	0.0823529	SCZ
ZNF318	6	43342188	Frame_Shift_Del	AG	A	P1100fs	5	34	0.128205	CHS
ZNF318	6	43342674	Splice_Site_Mutation	A	G	.	7	23	0.233333	COPDGene
ZNF318	6	43342675	Splice_Site	C	A	.	7	103	0.0636364	AJ
ZNF318	6	43342751	Nonsense_Mutation	C	T	W1067*	10	36	0.217391	WHI
ZNF318	6	43342814	Nonsense_Mutation	TG	T	S1046*	9	18	0.333333	COPDGene
ZNF318	6	43348345	Frame_Shift_Del	GA	G	F1017fs	5	34	0.128205	CHS
ZNF318	6	43348374	Frame_Shift_Ins	-	T	S1008fs	8	56	0.125	PROMIS
ZNF318	6	43348421	Frame_Shift_Del	A	-	L992fs	13	222	0.0553191	EK
ZNF318	6	43348478	Nonsense_Mutation	A	AGTTCAGATTG	L973_D974delinsPIX	3	26	0.103448	COPDGene
ZNF318	6	43348605	Nonsense_Mutation	G	A	R931*	3	42	0.0666667	COPDGene
ZNF318	6	43348605	Nonsense_Mutation	G	A	R931*	5	52	0.0877193	SCZ
ZNF318	6	43352376	Splice_Site_Mutation	C	T	.	7	26	0.212121	WHI
ZNF318	6	43352376	Splice_Site_Mutation	C	T	.	4	35	0.102564	WHI
ZNF318	6	43352376	Splice_Site_Mutation	C	T	.	6	27	0.181818	WHI
ZNF318	6	43352376	Splice_Site	C	T	.	6	39	0.133333	UA
ZNF318	6	43352383	Nonsense_Mutation	G	A	Q922*	8	38	0.173913	AJ
ZNF318	6	43352455	Frame_Shift_Del	GT	G	K897fs	5	29	0.147059	WHI
ZNF318	6	43354664	Frame_Shift_Del	CT	C	K890fs	4	29	0.121212	FHS
ZNF318	6	43354758	Frame_Shift_Ins	-	T	A859fs	16	49	0.246154	ATVB
ZNF318	6	43354777	Nonsense_Mutation	G	A	R853*	5	96	0.049505	MEC
ZNF318	6	43354778	Frame_Shift_Ins	-	AG	L852fs	12	87	0.121212	AJ
ZNF318	6	43354828	Frame_Shift_Del	GAA	G	L835fs	3	39	0.0714286	FHS
ZNF318	6	43354831	Frame_Shift_Del	GA	G	N834fs	3	31	0.0882353	WHI
ZNF318	6	43354855	Nonsense_Mutation	G	A	Q827*	15	23	0.394737	WHI
ZNF318	6	43354858	Frame_Shift_Del	TG	T	T825fs	3	39	0.0714286	CHS
ZNF318	6	43354937	Frame_Shift_Del	G	-	A799fs	11	81	0.119565	SS
ZNF318	6	43354969	Frame_Shift_Del	CAA	C	F788fs	4	21	0.16	FHS
ZNF318	6	43355096	Frame_Shift_Del	TG	T	P746fs	3	32	0.0857143	BioMe
ZNF318	6	43355137	Nonsense_Mutation	G	A	Q733*	5	42	0.106383	BioMe
ZNF318	6	43355146	Frame_Shift_Del	TACCA	T	V728fs	3	39	0.0714286	BioMe
ZNF318	6	43355210	Frame_Shift_Ins	G	GT	N708fs	3	36	0.0769231	COPDGene
ZNF318	6	43355235	Frame_Shift_Del	AC	A	V700fs	7	29	0.194444	WHI
ZNF318	6	43355332	Nonsense_Mutation	G	A	R668*	3	28	0.0967742	WHI
ZNF318	6	43355332	Nonsense_Mutation	G	A	R668*	48	45	0.516129	PROMIS
ZNF318	6	43355332	Nonsense_Mutation	G	A	R668*	5	109	0.0438596	MexB1
ZNF318	6	43355335	Frame_Shift_Del	C	-	D667fs	15	234	0.060241	PROMIS
ZNF318	6	43355417	Nonsense_Mutation	G	T	Y639*	4	30	0.117647	FHS
ZNF318	6	43355422	Nonsense_Mutation	G	A	R638*	8	19	0.296296	BioMe
ZNF318	6	43355422	Nonsense_Mutation	G	A	R638*	3	34	0.0810811	CHS
ZNF318	6	43355422	Nonsense_Mutation	G	A	R638*	35	91	0.277778	PROMIS
ZNF318	6	43355476	Frame_Shift_Del	GA	G	L619fs	3	19	0.136364	WHI
ZNF318	6	43355482	Nonsense_Mutation	G	A	R618*	5	42	0.106383	CHS
ZNF318	6	43355482	Nonsense_Mutation	G	A	R618*	5	36	0.121951	WHI
ZNF318	6	43355482	Nonsense_Mutation	G	A	R618*	4	35	0.102564	CHS
ZNF318	6	43355482	Nonsense_Mutation	G	A	R618*	4	26	0.133333	WHI
ZNF318	6	43355482	Nonsense_Mutation	G	A	R618*	9	188	0.0456853	SCZ
ZNF318	6	43355482	Nonsense_Mutation	G	A	R618*	9	164	0.0520231	AW
ZNF318	6	43355665	Frame_Shift_Del	TC	T	G556fs	11	29	0.275	WHI
ZNF318	6	43355697	Nonsense_Mutation	A	T	L546*	6	17	0.26087	COPDGene
ZNF318	6	43355698	Frame_Shift_Del	AAT	A	D545fs	10	39	0.204082	CHS
ZNF318	6	43355784	Frame_Shift_Ins	G	GAC	S517fs	3	25	0.107143	WHI
ZNF318	6	43355811	Frame_Shift_Del	GA	G	S508fs	5	31	0.138889	FHS
ZNF318	6	43355853	Frame_Shift_Del	AG	A	L494fs	3	31	0.0882353	CHS
ZNF318	6	43355853	Frame_Shift_Del	AG	A	L494fs	16	14	0.533333	WHI
ZNF318	6	43355931	Frame_Shift_Del	TC	-	E468fs	10	63	0.136986	PROMIS
ZNF318	6	43356142	Nonsense_Mutation	C	A	E398*	7	47	0.12963	SL
ZNF318	6	43356146	Splice_Site_Mutation	C	A	.	3	29	0.09375	FHS
ZNF318	6	43357323	Nonsense_Mutation	G	A	R331*	6	24	0.2	FHS
ZNF318	6	43357323	Nonsense_Mutation	G	A	R331*	3	36	0.0769231	MexB3
ZNF318	6	43357347	Nonsense_Mutation	G	A	R323*	4	29	0.121212	FHS
ZNF318	6	43357347	Nonsense_Mutation	G	A	R323*	6	76	0.0731707	FUSION
ZNF318	6	43357368	Nonsense_Mutation	G	A	R316*	7	61	0.102941	PROMIS
ZNF318	6	43357617	Nonsense_Mutation	G	A	R233*	25	123	0.168919	MGH-PCAD
ZNF318	6	43357617	Nonsense_Mutation	G	A	R233*	4	21	0.16	BioMe
ZNF318	6	43357617	Nonsense_Mutation	G	A	R233*	5	68	0.0684932	SCZ
ZNF318	6	43357641	Nonsense_Mutation	G	A	R225*	4	24	0.142857	FHS
ZNF318	6	43357641	Nonsense_Mutation	G	A	R225*	5	24	0.172414	WHI
ZNF318	6	43357641	Nonsense_Mutation	G	A	R225*	5	139	0.0347222	SCZ
ZNF318	6	43357659	Nonsense_Mutation	G	A	Q219*	3	25	0.107143	COPDGene
ZNF318	6	43357692	Nonsense_Mutation	G	A	Q208*	4	34	0.105263	COPDGene
ZNF318	6	43357704	Nonsense_Mutation	G	A	R204*	15	141	0.0961538	SCZ
ZNF318	6	43365347	Nonsense_Mutation	G	A	R165*	19	40	0.322034	PROMIS
ZNF318	6	43365347	Nonsense_Mutation	G	A	R165X	3	18	0.142857	BioMe
ZNF318	6	43369043	Frame_Shift_Del	CCTCTGAAGCCGGCCGGGCCCGG	C	P101fs	3	43	0.0652174	CHS

## Sheet: table_s4
Supplementary Table S4: Cohort information for replication set.
Cohort	Total n	CHIP carriers	Mean age	Reference
BioMe	9649	619	55.6655	Belbin 2017
CHS	3525	533	74.0914	Fried 1991
COPDGene	10581	651	59.2775	Regan 2010
FHS	4184	299	60.8319	Feinleib 1975
WHI	11068	990	68.663	WHI 1998

## Sheet: table_s5
Supplementary Table S5: Age association analysis for ExAC cohort.
Gene (referent is no mutation)	Estimate	std.error	p.value
ASXL1	9.89063	0.98457	1.01816e-23
ASXL2	0.824155	11.795	0.944295
BCORL1	4.57416	5.89771	0.438
BRAF	2.10421	4.81558	0.662142
BRCC3	5.58416	3.55675	0.116418
CBL	10.8736	2.27064	1.68358e-06
CREBBP	1.63416	5.89771	0.781718
CTCF	-1.17584	11.795	0.920591
CUX1	3.05976	8.34043	0.713726
DNMT3A	8.98555	0.391804	1.01478e-115
EP300	1.34526	5.27514	0.798709
EZH2	-7.17584	8.34043	0.38959
FLT3	6.02142	11.795	0.6097
GNAS	8.01646	3.27181	0.014283
GNB1	10.3275	2.02361	3.34798e-07
IDH1	13.3242	8.34043	0.110153
IDH2	4.09226	4.45841	0.35869
IKZF1	-6.17584	8.34043	0.459018
JAK1	-4.17584	11.795	0.723314
JAK2	2.84413	1.39122	0.0409252
JAK3	-3.17584	11.795	0.787736
KDM6A	-1.51584	5.27514	0.773841
KIT	1.82416	8.34043	0.826875
KRAS	11.7492	5.89771	0.0463602
MLL	10.8242	11.795	0.358786
MLL2	-19.5092	6.81001	0.00417497
MPL	9.82416	11.795	0.404901
NF1	7.63527	3.93204	0.0521667
NRAS	8.50926	3.7303	0.0225462
NXF1	8.32416	3.7303	0.0256533
PDS5B	3.02416	5.27514	0.566455
PHF6	6.32416	8.34043	0.448304
PHIP	4.43166	2.94927	0.132942
PPM1D	9.24865	1.62116	1.17112e-08
PRPF8	13.0317	4.45841	0.00346899
PTEN	-1.17584	11.795	0.920591
PTPN11	19.7481	5.89771	0.000813361
RAD21	14.9242	3.7303	6.32346e-05
RUNX1	-14.1758	11.795	0.229428
SETD2	-1.09334	5.89771	0.852928
SETDB1	3.82416	11.795	0.745774
SF3B1	13.6234	1.86581	2.89132e-13
SMC1A	10.8242	11.795	0.358786
SMC3	9.59916	5.89771	0.103615
SRCAP	4.10406	2.51533	0.102766
SRSF2	20.3741	2.86125	1.09003e-12
STAG1	-1.92584	5.89771	0.744017
STAG2	14.8242	8.34043	0.0755117
SUZ12	3.13416	3.7303	0.400808
TET2	12.1217	1.08731	7.96983e-29
TP53	8.47091	1.74	1.12927e-06
U2AF1	9.22416	5.27514	0.0803654
WT1	3.32416	8.34043	0.69022
YLPM1	12.8534	2.57449	5.97988e-07
ZBTB33	12.4543	1.42109	1.9517e-18
ZNF318	7.95707	1.96664	5.21853e-05
ZRSR2	7.07416	8.34043	0.396344

## Sheet: table_s6
Supplementary Table S6: Age association analysis for TOPMed cohort.
Gene (referent is no mutation)	Estimate	std.error	p.value
ASXL1	8.17783	0.890028	4.18624e-20
ASXL2	10.2155	5.03462	0.0424609
BCOR	5.72636	7.11973	0.421232
BCORL1	10.6864	4.36023	0.0142556
BRAF	0.393028	7.11973	0.955977
BRCC3	8.24939	3.2963	0.012332
CBL	4.951	3.0835	0.10836
CREBBP	-9.94031	12.3314	0.420191
CTCF	10.0597	12.3314	0.414631
CUX1	1.55969	6.16595	0.800306
DNMT3A	6.79214	0.334394	3.06945e-91
EP300	0.059695	8.71973	0.994538
ETNK1	13.2028	6.16595	0.032261
ETV6	1.05969	8.71973	0.903273
EZH2	11.393	7.11973	0.109561
GNAS	8.69838	2.82973	0.00211412
GNB1	10.7097	2.57207	3.13613e-05
IDH1	12.1574	8.71973	0.163252
IDH2	15.893	5.03462	0.00159663
IKZF1	-2.94031	12.3314	0.811541
JAK2	8.30067	1.69509	9.77565e-07
KDM6A	8.32998	6.16595	0.176715
KIT	5.05969	12.3314	0.681581
KRAS	4.24849	3.90002	0.276006
MPL	16.8713	8.71973	0.0530169
NF1	9.44682	4.66122	0.0427017
NRAS	6.05969	8.71973	0.487097
NXF1	-4.94031	12.3314	0.688696
PDS5B	9.80969	4.36023	0.0244667
PHF6	15.0597	12.3314	0.221999
PHIP	8.17081	2.90723	0.00494879
PPM1D	10.1546	1.22874	1.4508e-16
PRPF8	11.6277	4.11092	0.00467914
PTEN	1.05969	12.3314	0.931519
RAD21	9.40904	5.03462	0.0616489
SETD2	-0.940305	7.11973	0.894929
SF3B1	11.4126	1.47531	1.05335e-14
SMC3	0.386347	5.03462	0.938832
SRCAP	8.85185	2.51795	0.00043943
SRSF2	10.389	1.74512	2.65299e-09
STAG2	6.67435	8.71973	0.44402
SUZ12	-0.340305	5.51507	0.950798
TET2	10.0576	0.569566	1.65998e-69
TP53	9.20109	1.97566	3.21572e-06
U2AF1	14.643	3.2963	8.92698e-06
YLPM1	4.95817	2.14759	0.0209645
ZBTB33	9.69285	1.66403	5.75909e-09
ZNF318	8.15664	1.66403	9.53759e-07
ZRSR2	17.8461	8.71973	0.0407004

## Sheet: table_s7
Supplementary Table S7: Mutations identified in SRCAP, YLPM1, ZBTB33, and ZNF318 in cohort of 1206 MDS patients.
Gene name	ID	Chromosome	Start position	End position	Ref	Alt	cDNA change	Protein change	Effect	Center	VAF
SRCAP	E-H-100279-T1-1-D1-1	16	30732119	30732119	C	T	c.3073C>T	p.R1025*	stop_gained	PV	0.065
SRCAP	E-H-100377-T1-1-D1-1	16	30727432	30727432	A	T	c.2539A>T	p.K847*	stop_gained	PV	0.037
SRCAP	E-H-116646-T1-1-D1-1	16	30736319	30736320	C	CA	c.5574_5575insA	p.S1859fs*41	frameshift_variant	KI	0.0327
SRCAP	E-H-116676-T1-1-D1-1	16	30720855	30720856	T	TG	c.655_656insG	p.S219fs*4	frameshift_variant	KI	0.0949
SRCAP	E-H-116736-T1-1-D1-1	16	30731610	30731611	A	AC	c.2945_2946insC	p.P985fs*19	frameshift_variant	KI	0.0529
SRCAP	E-H-120829-T1-1-D1-3	16	30734343	30734344	C	CG	c.3952_3953insG	p.D1319fs*66	frameshift_variant	KI	0.0424
SRCAP	E-H-120829-T1-1-D1-3	16	30736171	30736188	C	CCCCAGCCTCCACACAGT	c.5426_5427insCCCAGCCTCCACACAGT	p.P1816fs*42	frameshift_variant	KI	0.2854
SRCAP	E-H-120855-T1-1-D1-3	16	30745018	30745019	C	CA	c.6393_6394insA	p.T2132fs*6	frameshift_variant	KI	0.0624
SRCAP	E-H-120912-T1-1-D1-1	16	30723257	30723258	GA	G	c.1595delA	p.E532fs*47	frameshift_variant	KI	0.0793
SRCAP	E-H-120925-T1-1-D1-1	16	30736257	30736259	GTA	G	c.5513_5514delTA	p.S1839fs*8	frameshift_variant	KI	0.3018
SRCAP	E-H-100349-T1-1-D1-1	16	30731557	30731573	GCCCCGGCACCGCCTCT	G	c.2893_2908del16	p.P965fs*6	frameshift_variant	PV	0.1585
SRCAP	E-H-120961-T1-1-D1-1	16	30732155	30732156	AC	A	c.3110delC	p.P1038fs*12	frameshift_variant	KI	0.377
YLPM1	E-H-100178-T1-1-D1-1	14	75248201	75248201	G	A	c.1455G>A	p.W485*	stop_gained	PV	0.023
YLPM1	E-H-100190-T1-1-D1-1	14	75245171	75245171	C	T	c.895C>T	p.R299*	stop_gained	PV	0.081
YLPM1	E-H-100197-T1-1-D1-1	14	75264648	75264649	C	CA	c.2648_2649insA	p.F884fs*17	frameshift_variant	PV	0.3347
YLPM1	E-H-100238-T1-1-D1-1	14	75265205	75265205	C	T	c.3205C>T	p.R1069*	stop_gained	PV	0.454
YLPM1	E-H-100248-T1-1-D1-1	14	75230968	75230970	CTG	C	c.777_778delTG	p.V260fs*15	frameshift_variant	PV	0.4113
YLPM1	E-H-100363-T1-1-D1-1	14	75265663	75265663	G	A	c.3663G>A	p.W1221*	stop_gained	PV	0.021
YLPM1	E-H-100367-T1-1-D1-1	14	75230823	75230824	TC	T	c.632delC	p.S212fs*7	frameshift_variant	PV	0.0369
YLPM1	E-H-116653-T1-2-D1-1	14	75285018	75285018	G	C	c.6030+1G>C	p.?	splice_site_variant	KI	0.465
YLPM1	E-H-116674-T1-1-D1-1	14	75230632	75230633	CT	C	c.441delT	p.E148fs*71	frameshift_variant	KI	0.4239
YLPM1	E-H-120923-T1-1-D1-3	14	75247186	75247186	C	T	c.1189C>T	p.R397*	stop_gained	KI	0.053
YLPM1	E-H-121000-T1-1-D1-3	14	75248898	75248898	C	T	c.2152C>T	p.Q718*	stop_gained	KI	0.02
YLPM1	E-H-121098-T1-1-D1-3	14	75248492	75248496	CTCTT	C	c.1747_1750delTCTT	p.S583fs*63	frameshift_variant	KI	0.2602
YLPM1	E-H-131833-T1-1-D1-1	14	75247285	75247285	C	T	c.1288C>T	p.Q430*	stop_gained	KI	0.026
YLPM1	E-H-131855-T1-1-D1-1	14	75265053	75265053	C	A	c.3053C>A	p.S1018*	stop_gained	KI	0.049
YLPM1	E-H-120883-T1-1-D1-3	14	75265029	75265029	T	G	c.3029T>G	p.L1010*	stop_gained	KI	0.542
YLPM1	E-H-120948-T1-1-D1-3	14	75230313	75230323	ACTCCCGCGGC	A	c.122_131delCTCCCGCGGC	p.A43fs*6	frameshift_variant	KI	0.4754
ZBTB33	E-H-100116-T1-1-D1-1	X	119387957	119387970	TGCACCTAGTGCTA	T	c.688_700delGCACCTAGTGCTA	p.P231fs*6	frameshift_variant	PV	0.7819
ZBTB33	E-H-100166-T1-1-D1-1	X	119388972	119388972	C	G	c.1702C>G	p.H568D	non_synonymous_codon	PV	0.995
ZBTB33	E-H-100186-T1-1-D1-1	X	119389216	119389220	ATGAT	A	c.1947_1950delTGAT	p.D650fs*7	frameshift_variant	PV	0.3713
ZBTB33	E-H-100263-T1-1-D1-1	X	119388573	119388573	G	T	c.1303G>T	p.A435S	non_synonymous_codon	PV	0.683
ZBTB33	E-H-100330-T1-1-D1-1	X	119387276	119387277	GA	G	c.7delA	p.S3fs*4	frameshift_variant	PV	0.0863
ZBTB33	E-H-100335-T1-1-D1-1	X	119388912	119388912	C	T	c.1642C>T	p.R548*	stop_gained	PV	0.961
ZBTB33	E-H-116332-T1-2-D1-1	X	119388622	119388623	AC	A	c.1353delC	p.P452fs*25	frameshift_variant	KI	0.4781
ZBTB33	E-H-116364-T1-1-D1-1	X	119388850	119388850	G	A	c.1580G>A	p.C527Y	non_synonymous_codon	KI	0.038
ZBTB33	E-H-116384-T1-1-D1-1	X	119388843	119388843	C	T	c.1573C>T	p.R525C	non_synonymous_codon	KI	0.027
ZBTB33	E-H-116434-T1-1-D1-1	X	119387391	119387391	C	T	c.121C>T	p.R41*	stop_gained	KI	0.447
ZBTB33	E-H-116493-T1-1-D1-1	X	119387422	119387422	C	T	c.152C>T	p.S51L	non_synonymous_codon	KI	0.953
ZBTB33	E-H-116593-T1-2-D1-1	X	119388574	119388574	C	G	c.1304C>G	p.A435G	non_synonymous_codon	KI	0.25
ZBTB33	E-H-120818-T1-1-D1-3	X	119388831	119388831	A	T	c.1561A>T	p.K521*	stop_gained	KI	0.157
ZBTB33	E-H-120882-T1-1-D1-1	X	119388879	119388879	C	A	c.1609C>A	p.R537S	non_synonymous_codon	KI	0.958
ZBTB33	E-H-120903-T1-1-D1-3	X	119387616	119387616	C	T	c.346C>T	p.L116F	non_synonymous_codon	KI	0.038
ZBTB33	E-H-131879-T1-1-D1-1	X	119387515	119387515	T	C	c.245T>C	p.L82P	non_synonymous_codon	KI	0.881
ZNF318	E-H-120920-T1-1-D1-1	6	43325061	43325061	G	A	c.991C>T	p.R331*	stop_gained	KI	0.483
ZNF318	E-H-121012-T1-1-D1-3	6	43337042	43337047	CCCCCG	C	c.57_61delCGGGG	p.G20fs*121	frameshift_variant	KI	0.3373
ZNF318	E-H-121152-T1-1-D1-3	6	43308241	43308241	C	T	c.3496-1G>A	p.?	splice_site_variant	KI	0.48
ZNF318	I-H-100778-N1-1-D1-1	6	43325224	43325224	A	C	c.828T>G	p.Y276*	stop_gained	KI	0.095

## Sheet: table_s8
Supplementary Table S8: Variant allele fractions for selected splicing associated genes in ZBTB33 mutant cases.
case	1	2	3	4	5	6	7	8	9	10	11	12	13	14
sex	M	M	M	M	M	F	F	F	M	M	F	M	F	M
ZBTB33 mutation	p.P231fs*6	p.H568D	p.D650fs*7	p.A435S	p.R548*	p.P452fs*25	p.C527Y	p.R41*	p.S51L	p.A435G	p.K521*	p.R537S	p.L116F	p.L82P
VAF	0.7819	0.995	0.3713	0.683	0.961	0.4781	0.038	0.447	0.953	0.25	0.157	0.958	0.038	0.881
Splicing mutation	SF3B1 p.K700E, SF3B1 p.R625C	SRSF2 p.P95H	SF3B1 p.K700E	ZRSR2 p.W75*	ZRSR2 c.827+ splice site variant	SRSF2 p.P95H	SF3B1 p.K700E	SRSF2 p.P95H	PRPF8 p.R1617Q, PRPF40B p.Q452R. SRSF2 p.P95H	SF3B1 p.R625L	SF3B1 p.K700E	SRSF2 p.P95H	SF1 p.P15T, SF3B1 p.H662Q	SF3B1 p.H662Q, PRPF40A p.L98S
VAF	0.034, 0.384	0.489	0.218	0.674	0.9767	0.436	0.371	0.464	0.475, 0.47, 0.442	0.077	0.302	0.468	0.352, 0.092	0.423, 0.52

## Sheet: table_s9
Supplementary Table S9: Mutation status of samples with ZBTB33 mutation in cohort of 127 MDS patients.
		SF3B1 status								ZBTB33 status
UNIQUE_PATIENT_ID	SEX	NM	ccds	SF3B1 exon	c.	p.	POSITION START	POSITION END	VAF	NM	ccds	ZBTB33 exon	c.	p.	POSITION START	POSITION END	VAF	TAG
PV886	M	NM_012433	CCDS33356.1	exon15	c.A2098G	p.K700E	198266834	198266834	28.2768	NM_001184742	CCDS14596.1	exon3	c.518delT	p.L173fs	119387787	119387787	12.454	driver
PV259	M	NM_012433	CCDS33356.1	exon15	c.2098_2103del	p.700_701del	198266829	198266834	21.0641	NM_001184742	CCDS14596.1	exon3	c.A1533T	p.R511S	119388803	119388803	67.27	driver
PV19	F	NM_012433	CCDS33356.1	exon15	c.A2098G	p.K700E	198266834	198266834	47.2337	NM_001184742	CCDS14596.1	exon3	c.G1647C	p.R549S	119388917	119388917	48.75	driver

## Sheet: table_s10
Supplementary Table S10: Proteins significantly enriched in WT and mutant ZBTB33 IPs compared to untransduced control IPs. (adj. p <0.05)
red: proteins associated with splicing, blue: mitochondrial proteins, purple: mitochondrial and splicing-associated proteins
Enriched in WT, R26C, G438D, and C552R (5)	Enriched in WT, R26C, and G438D (50)	Enriched in WT, G438D, and C552R (1)	Enriched in WT and R26C (46)	Enriched in WT and G438D (15)	Enriched in R26C and G438D (4)	Enriched in WT only (46)	Enriched in R26C only (197)	Enriched in G438D only (5)
FLNC	ACTR1A	ZRANB2	ACTR2	ACBD7	CDC20	ALDH16A1	AASDHPPT	KIF2A
RPL34	ANXA5		ARPC4	AK4	HBG2	ANP32E	ABCF3	NEK9
S100A6	ASNA1		CBX3	ANXA3	MYEF2	ARHGDIB	ACAT2	PDE4DIP
ZBTB33	BTF3		CDK1	APEX1	UBE2V2	ATP5EP2	ACOT7	PPP6R3
ZNF598	CACYBP		CFL1	BPNT1		ATP5H	ADSS	UBE2V1
	CHTOP		CIRBP	C1QBP		ATP6V1E1	AHSA1
	CSNK2A1		CKAP5	DARS2		c14orf166	AKR1C1
	DDX46		D6W592	EIF4E		CHMP4B	AKR1C3
	ENSA		DHPS	HSPA5		CLIC4	ALDH18A1
	ESD		DNAJC8	MACROD1		CNOT11	ANK1
	FAM129B		DNMT1	PCMT1		COX7A2	ANXA1
	FAM3C		DUT	S100A11		CPSF7	ARHGDIA
	FLNB		ENY2	TPD52L2		CWC15	ATF1
	FMR1		FXR1	TRIM25		DDX21	ATP6V0D1
	FXR2		GLG1	UBA1		FEN1	BAG2
	GBF1		GRWD1			GMFG	BID
	HNRNPM		HAT1			GRPEL1	BLVRB
	HSPA8		HSP90AB1			HSPA9	BZW1
	HSPH1		MAPRE1			IARS2	BZW2
	ITGA2B		MCM2			IGF2BP1	c19orf43
	KIF2C		MCM4			KDM3B	CAST
	LPCAT1		MPP1			LRPPRC	CD151
	LYPLA1		MRPS34			MAP2K2	CDC37
	LYPLA2		NAP1L1			ME1	CDC73
	MRPL40		NCAPG			NAA50	CDK4
	MRPS5		NDC1			NDUFA7	CDKN2A
	MYO19		NPEPPS			NRDC	CHCHD2
	OLA1		PA2G4			PFDN2	CHMP2B
	PPIB		PCNA			PPIL1	CHORDC1
	PPID		POLR2E			PPP4R1	CIAPIN1
	PPM1B		PSMD13			PTPRC	CLNS1A
	PPME1		PSME3			RASGRP4	CLPX
	PPP5C		RAB3D			RPS18	CLUH
	Q5TA95		RAB4B			RSL1D1	CNN2
	RAB10		RPL38			RUVBL1	CNP
	RBM12		SLC25A5			SAMM50	CSDE1
	RNF114		SLC25A6			SRRT	CTSD
	RPL14		SLIRP			SSB	CUL3
	RPS17		STAT3			SSRP1	DDX19A
	RPS27L		TBRG4			SUMO1	DDX24
	SRSF5		TIMM50			UBA6	DDX3Y
	SRSF9		TPT1			UBE2L3	DDX5
	SSBP1		TRIM28			UBE2M	DEK
	STRAP		TUBB4A			UBE2N	DHCR7
	SUGT1		U2SURP			UROD	DHX9
	TALDO1		UAP1			YWHAE	DNAJA1
	TBCA						DNAJB1
	TIPRL						DNAJC7
	TMED10						DPY30
	TMX1						DSTN
							EDF1
							EHD2
							EIF2B3
							EIF3I
							EIF3K
							EIF4A1
							EIF4A2
							EIF4G1
							EIF5
							EIF5B
							ELOVL1
							FADS2
							FAM50A
							FASN
							FBXO6
							FKBP8
							G3BP1
							G3BP2
							GALNT2
							GCLM
							GMPS
							GSE1
							GTF2B
							GTF2E2
							GTF2I
							GTSF1
							hba1
							HBB
							HBD
							HBS1L
							HBZ
							HGH1
							HM13
							HMBS
							HN1L
							HSP90AA1
							HSP90AB4P
							HSPA1A
							HSPB1
							HSPBP1
							IRF2BP1
							KIF11
							KPNA2
							LDHA
							lgals9
							LRRC40
							LRRC59
							LXN
							MAD2L1
							MAT2A
							MCM3
							MCM5
							MCM6
							MCM7
							MRPL11
							MT1G
							MT1X
							MT2A
							NAP1L4
							NAT10
							NCAPD2
							NCAPH
							NOLC1
							NOSIP
							NXF1
							OAT
							PAIP1
							PAIP2
							PCBP1
							PCBP2
							PDRG1
							PES1
							POLDIP3
							POLR2H
							POLRMT
							POP1
							PPM1G
							PPP1R14B
							PPP4R3A
							PRPS2
							PRRC2C
							PSMC1
							PSMC2
							PSMC4
							PSMC6
							PSMD12
							PSMD2
							PSMD7
							PSMG1
							PUM1
							QRICH1
							RAB11A
							RAB6B
							RAB8B
							RANGAP1
							RBM28
							RBM39
							RCOR1
							RFC4
							RGS10
							RIF1
							RNF20
							ROCK2
							RPAP3
							RPL10
							RPL4
							RPS13
							RPS16
							RPS2
							RPS27
							RPS9
							S100A13
							SAR1A
							SDF4
							SKIV2L2
							SLC25A13
							SLC25A3
							SMARCC1
							SNX3
							SNX5
							SPC24
							SPTLC2
							SRSF2
							SSBP3
							SUB1
							SUMO2
							sumo3
							TAL1
							TFRC
							TIMM13
							TMSB10
							TPX2
							TRAPPC3
							TUBB
							TUBB2A
							TUBB4B
							TUBB6
							TUBG1
							UAP1L1
							UBAP2
							UBAP2L
							UBL5
							XPO5
							YTHDF2
							YTHDF3
							ZC3H15
							ZNF428

[truncated: 9 more sheets: table_s11, table_s12, table_s13, table_s14, table_s15, table_s16, table_17, table_s18, table_s19]
